# Supplementary material
Source: Elsevier journal article supplement (https://comptes-rendus.academie-sciences.fr/geoscience/article/10.1016/j.crte.2017.09.007/file/attach/mmc1.pdf)
Supplement: mmc1 [file mmc1.pdf]

**Table 1.** Major and trace element concentrations of sediment cores from Sepetiba bay. The major elements concentrations (Ca, Mg, Ti, Fe, Si, Al and K) are expressed in percentage (%) and the trace elements concentrations (As, Cd, Pb, Zn, Ni, Cr, Cu, Mn and P) in parts per millions ( $\mu\text{g g}^{-1}$ ).

| <b>Sample</b>                   | <b>As</b> | <b>Cd</b> | <b>Pb</b> | <b>Zn</b> | <b>Ni</b> | <b>Cr</b> | <b>Cu</b> | <b>Mn</b> | <b>P</b> | <b>Ca</b> | <b>Mg</b> | <b>Ti</b> | <b>Fe</b> | <b>Si</b> | <b>Al</b> | <b>K</b> |
|---------------------------------|-----------|-----------|-----------|-----------|-----------|-----------|-----------|-----------|----------|-----------|-----------|-----------|-----------|-----------|-----------|----------|
| <i>T1 Core- Saco do Engenho</i> |           |           |           |           |           |           |           |           |          |           |           |           |           |           |           |          |
| T1 0-5                          | 24        | 65        | 118       | 21960     | 21        | 58        | 76        | 369       | 1115     | 3.9       | 0.9       | 0.5       | 5         | 20        | 12        | 0.8      |
| T1 5-10                         | 93        | 198       | 179       | 31410     | 16        | 54        | 175       | 471       | 783      | 1.0       | 0.8       | 0.5       | 6         | 17        | 10        | 0.4      |
| T1 10-15                        | 17        | 47        | 55        | 12560     | 5         | 23        | 68        | 210       | 366      | 1.3       | 0.6       | 0.5       | 6         | 29        | 7         | 0.6      |
| T1 15-20                        | 19        | 44        | 72        | 5330      | 14        | 44        | 176       | 321       | 725      | 1.4       | 0.4       | 0.2       | 2         | 34        | 5         | 0.6      |
| T1 20-25                        |           |           |           | 39330     | 24        | 75        | 329       | 677       | 1213     | 1.1       | 1.0       | 0.5       | 6         | 17        | 10        | 0.6      |
| T1 25-30                        | 12        | 30        | 57        | 28980     | 22        | 65        | 224       | 578       | 1072     | 0.8       | 0.9       | 0.5       | 6         | 17        | 10        | 0.6      |
| T1 30-35                        |           |           |           | 6970      | 22        | 60        | 57        | 394       | 832      | 0.8       | 0.8       | 0.5       | 5         | 20        | 12        | 0.8      |
| T1 35-40                        | 18        | 48        | 69        | 9000      | 19        | 65        | 133       | 388       | 953      | 1.1       | 0.8       | 0.5       | 12        | 17        | 9         | 0.7      |
| T1 40-45                        |           |           |           | 28370     | 17        | 64        | 207       | 632       | 1084     | 0.6       | 1.0       | 0.6       | 7         | 18        | 12        | 1.2      |
| T1 45-50                        |           |           |           | 22640     | 21        | 65        | 238       | 659       | 903      | 0.6       | 0.9       | 0.6       | 6         | 18        | 11        | 1.2      |
| T1 50-55                        | 95        | 236       | 220       | 37540     | 23        | 62        | 324       | 521       | 1455     | 0.5       | 1.0       | 0.5       | 5         | 17        | 10        | 0.9      |

|          |    |     |     |       |    |    |     |     |      |     |     |     |   |    |    |     |
|----------|----|-----|-----|-------|----|----|-----|-----|------|-----|-----|-----|---|----|----|-----|
| T1 55-60 |    |     |     | 40400 | 20 | 62 | 105 | 427 | 894  | 1.0 | 1.0 | 0.6 | 6 | 19 | 11 | 1.1 |
| T1 60-65 | 36 | 98  | 154 | 16350 | 23 | 58 | 343 | 581 | 1518 | 0.7 | 1.0 | 0.5 | 6 | 20 | 13 | 1.2 |
| T1 65-70 |    |     |     | 42620 | 19 | 51 | 178 | 546 | 1408 | 0.6 | 1.1 | 0.5 | 5 | 17 | 11 | 0.9 |
| T1 75-80 | 97 | 219 | 501 | 18830 | 19 | 56 | 168 | 463 | 1361 | 0.6 | 1.0 | 0.6 | 5 | 18 | 11 | 1.0 |
| T1 80-85 | 99 | 161 | 258 | 20470 | 21 | 58 | 184 | 447 | 1118 | 0.5 | 1.0 | 0.5 | 5 | 18 | 11 | 0.9 |

*T3 Core- São Francisco Channel*

|          |   |    |    |     |    |    |    |     |      |     |     |     |   |    |    |     |
|----------|---|----|----|-----|----|----|----|-----|------|-----|-----|-----|---|----|----|-----|
| T3 0-5   | 6 | 1  | 42 | 181 | 18 | 55 | 20 | 706 | 1088 | 1.4 | 0.7 | 1.5 | 4 | 30 | 10 | 2.6 |
| T3 5-10  | 6 | 39 | 44 | 189 | 15 | 57 | 18 | 452 | 943  | 1.2 | 0.7 | 1.3 | 4 | 28 | 10 | 2.5 |
| T3 10-15 | 7 | 1  | 48 | 278 | 19 | 61 | 24 | 402 | 848  | 1.3 | 0.8 | 1.0 | 5 | 26 | 11 | 2.1 |
| T3 15-20 | 9 | 2  | 47 | 381 | 16 | 55 | 19 | 416 | 708  | 1.2 | 0.7 | 1.1 | 4 | 28 | 9  | 2.2 |
| T3 20-25 | 9 | 2  | 63 | 397 | 19 | 60 | 24 | 387 | 711  | 1.0 | 0.7 | 0.9 | 4 | 26 | 11 | 2.0 |
| T3 25-30 | 4 | 0  | 42 | 122 | 17 | 57 | 20 | 328 | 632  | 1.1 | 0.7 | 0.9 | 3 | 28 | 11 | 2.5 |
| T3 30-35 | 4 | 1  | 44 | 146 | 20 | 51 | 23 | 309 | 571  | 1.1 | 0.8 | 0.7 | 4 | 27 | 12 | 2.2 |
| T3 35-40 | 4 | 0  | 44 | 155 | 23 | 60 | 30 | 329 | 563  | 0.9 | 0.9 | 0.7 | 4 | 23 | 11 | 1.7 |
| T3 40-45 | 4 | 1  | 52 | 207 | 26 | 63 | 31 | 341 | 661  | 0.8 | 0.8 | 0.7 | 5 | 23 | 12 | 1.6 |

|          |    |   |     |     |    |    |    |     |     |     |     |     |   |    |    |     |
|----------|----|---|-----|-----|----|----|----|-----|-----|-----|-----|-----|---|----|----|-----|
| T3 45-50 | 45 | 5 | 440 | 111 | 22 | 59 | 27 | 512 | 823 | 1.1 | 0.8 | 1.2 | 4 | 25 | 11 | 2.3 |
| T3 50-55 | 5  | 0 | 44  | 105 | 24 | 62 | 27 | 694 | 647 | 0.8 | 0.8 | 0.8 | 5 | 26 | 12 | 2.5 |

*T4 Core- Enseada das Garças*

|          |    |   |    |     |    |    |    |     |      |     |     |     |   |    |    |     |
|----------|----|---|----|-----|----|----|----|-----|------|-----|-----|-----|---|----|----|-----|
| T4 0-5   | 13 | 3 | 41 | 639 | 19 | 56 | 24 | 924 | 1123 | 1.1 | 1.1 | 0.5 | 5 | 19 | 11 | 0.8 |
| T4 5-10  | 12 | 3 | 41 | 758 | 21 | 64 | 29 | 814 | 1246 | 1.1 | 1.1 | 0.6 | 5 | 21 | 12 | 1.0 |
| T4 10-15 | 13 | 3 | 42 | 747 | 24 | 63 | 33 | 601 | 1100 | 0.9 | 1.1 | 0.6 | 5 | 22 | 11 | 1.0 |
| T4 15-20 | 14 | 4 | 46 | 888 | 24 | 72 | 36 | 788 | 1269 | 0.8 | 1.2 | 0.6 | 5 | 20 | 11 | 1.0 |
| T4 20-25 | 12 | 4 | 46 | 904 | 21 | 66 | 35 | 897 | 1209 | 0.8 | 1.0 | 0.7 | 5 | 20 | 11 | 1.0 |
| T4 25-30 | 10 | 3 | 42 | 852 | 19 | 59 | 32 | 953 | 1086 | 0.8 | 1.0 | 0.6 | 5 | 21 | 10 | 1.0 |
| T4 30-35 | 11 | 3 | 41 | 986 | 21 | 63 | 37 | 839 | 1182 | 0.8 | 1.0 | 0.6 | 5 | 21 | 11 | 1.0 |

*T5 Core- Marambaia*

|          |    |   |    |     |    |    |    |      |      |     |     |     |   |    |   |     |
|----------|----|---|----|-----|----|----|----|------|------|-----|-----|-----|---|----|---|-----|
| T5 0-5   | 13 | 1 | 33 | 298 | 26 | 76 | 27 | 1904 | 1218 | 3.1 | 1.5 | 0.5 | 4 | 20 | 9 | 1.1 |
| T5 5-10  | 14 | 1 | 43 | 288 | 25 | 74 | 20 | 1056 | 1036 | 3.0 | 1.6 | 0.5 | 4 | 22 | 9 | 1.2 |
| T5 10-15 | 11 | 1 | 29 | 356 | 27 | 80 | 24 | 1409 | 1069 | 2.6 | 1.5 | 0.5 | 4 | 21 | 8 | 1.1 |
| T5 15-20 | 14 | 2 | 31 | 418 | 26 | 80 | 23 | 1486 | 979  | 2.9 | 1.5 | 0.6 | 4 | 22 | 9 | 1.3 |

|          |    |   |    |     |    |    |    |      |      |     |     |     |   |    |    |     |
|----------|----|---|----|-----|----|----|----|------|------|-----|-----|-----|---|----|----|-----|
| T5 20-25 | 13 | 2 | 31 | 467 | 27 | 89 | 23 | 1339 | 1024 | 1.8 | 1.6 | 0.6 | 4 | 26 | 9  | 1.5 |
| T5 25-30 | 11 | 2 | 35 | 501 | 26 | 89 | 24 | 1215 | 1067 | 2.3 | 1.6 | 0.7 | 5 | 25 | 10 | 1.5 |
| T5 30-35 | 11 | 3 | 35 | 632 | 31 | 94 | 29 | 1387 | 1144 | 1.8 | 1.5 | 0.6 | 4 | 24 | 9  | 1.5 |
| T5 35-40 | 10 | 3 | 33 | 578 | 28 | 85 | 22 | 1210 | 1030 | 2.5 | 1.5 | 0.7 | 4 | 24 | 9  | 1.6 |
| T5 40-45 | 9  | 2 | 32 | 442 | 28 | 87 | 22 | 1221 | 1006 | 2.8 | 1.4 | 0.6 | 4 | 19 | 9  | 1.3 |

**Table 2.** Enrichment Factor values of sediment cores from Sepetiba bay.

|    |         | As    | Cd      | Pb   | Zn      | Ni  | Cr  | Cu   |
|----|---------|-------|---------|------|---------|-----|-----|------|
| T1 | average | 20    | 874     | 8    | 303     | 1   | 1   | 11   |
|    | min-max | 5 -37 | 44-1776 | 3-20 | 149-554 | 0-1 | 1-2 | 3-18 |
| T3 | average | 3     | 35      | 3    | 3       | 1   | 1   | 1    |
|    | min-max | 1-16  | 0-302   | 2-18 | 1-6     | 1   | 1   | 1    |
| T4 | average | 4     | 24      | 2    | 11      | 1   | 1   | 2    |
|    | min-max | 4-5   | 22-24   | 2    | 9-13    | 1   | 1   | 1-2  |
| T5 | average | 5     | 17      | 2    | 7       | 1   | 2   | 1    |
|    | min-max | 4-6   | 9-26    | 2    | 5-10    | 1   | 2   | 1-2  |
